# Supplementary material for: Association of sickle cell disease with anthropometric indices among under-five children: evidence from 2018 Nigeria Demographic and Health Survey
Source: Springer Nature journal article supplement (doi:10.1186/s12916-020-01879-1), 2021-01-15

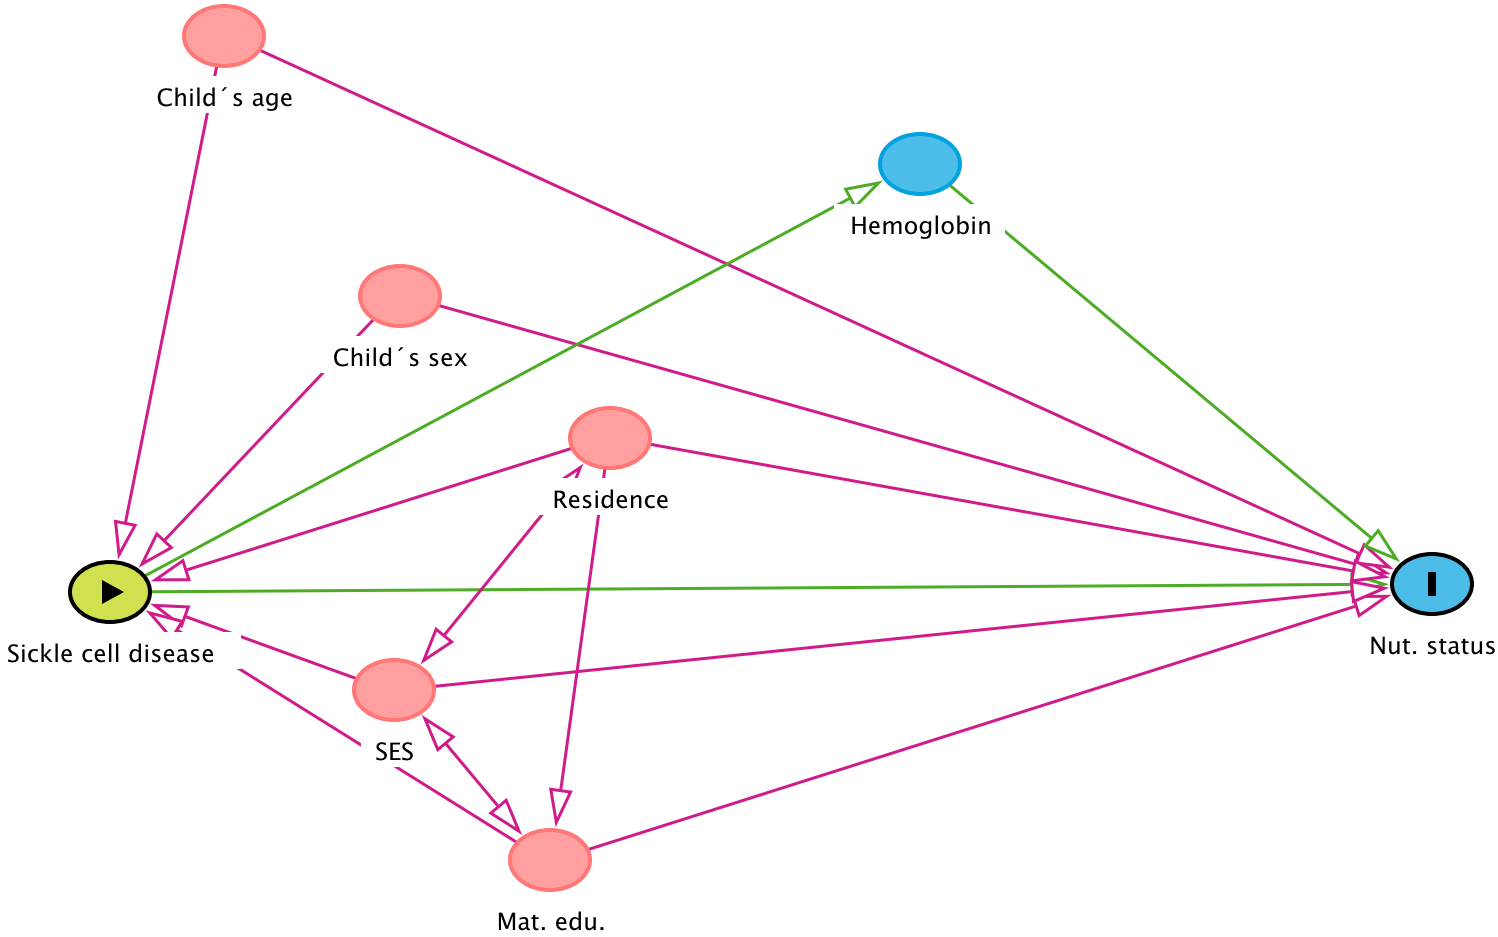

Supplement: MOESM1 [file 18771878]
